# Supplementary material for: Biochemical and Metabolical Pathways Associated with Microbiota-Derived Butyrate in Colorectal Cancer and Omega-3 Fatty Acids Implications: A Narrative Review
Source: Preprints.org preprint supplement (doi:10.20944/preprints202201.0320.v1), 2022-01-21
Supplement: Supplementary file 1 [file supplementary]

**Nutrients — Conflict of Interest Statement for Papers from MDPI Employees**

Dear Editorial Office,

My name is Madalina Preda, I am currently working as SIE and PM for Journal of Fungi and as PM for Fermentation and Epigenomes. I would like to submit a paper to Nutrients published by MDPI. The manuscript details are as follows:

Manuscript ID (if known):

Manuscript Title: Biochemical and Metabolical Pathways Associated with Microbiota-Derived Butyrate in Colorectal Cancer and Omega-3 Fatty Acids Implications: A Narrative Review

Authors: Adelina Silvana Dragomir, Șerban Negru, Mădălina Preda, Raluca Ioana Mihăilă, Isabela Anda Komporaly, Elena Adriana Dumitrescu, Cristian Virgil Lungulescu, Lidia Anca Kajanto, Bogdan Georgescu, Emanuel Alin Radu, Dana Lucia Stănculeanu

Corresponding Author(s): Șerban Negru, Mădălina Preda
Author Contributions: Conceptualization, D.L.S. and A.S.D.; methodology, M.P.; formal analysis, Ș.N.; investigation, R.I.M., I.A.K., E.A.D., L.A.K.; resources, C.V.L.; data curation, L.A.K., B.G and A.E.R.; writ-ing—original draft preparation, A.S.D., M.P., E.A.D.; writing—review and editing, A.S.D., D.L.S., Ș.N., C.V.L.; supervision, D.L.S.; project administration, D.L.S, Ș.N. All authors have read and agreed to the published version of the manuscript

I understand that as a MDPI employee I should declare all potential or potentially perceived conflicts of interests to the editorial office. In the manuscript, I will add a note in the Conflict of Interest part to declare that “the author Madalina Preda is an employee of MDPI, however he/she does not work for the journal Nutrients at the time of submission and publication”, if the paper can be accepted.

I understand the importance of the single blind / double blind peer-review process, even after manuscript acceptance or rejection, and confirm that neither I, nor associated parties, will check the peer review information of this paper or disclose the information to others.

Thank you very much for your consideration.

Best regards,

Madalina Preda
